# Supplementary material for: VISTA Emerges as a Promising Target against Immune Evasion Mechanisms in Medulloblastoma
Source: MDPI journal article supplement (doi:10.3390/cancers16152629), 2024-07-24

# Figure S1

## (a) Brain TILs (Full gating- CD45 bead enrichment)

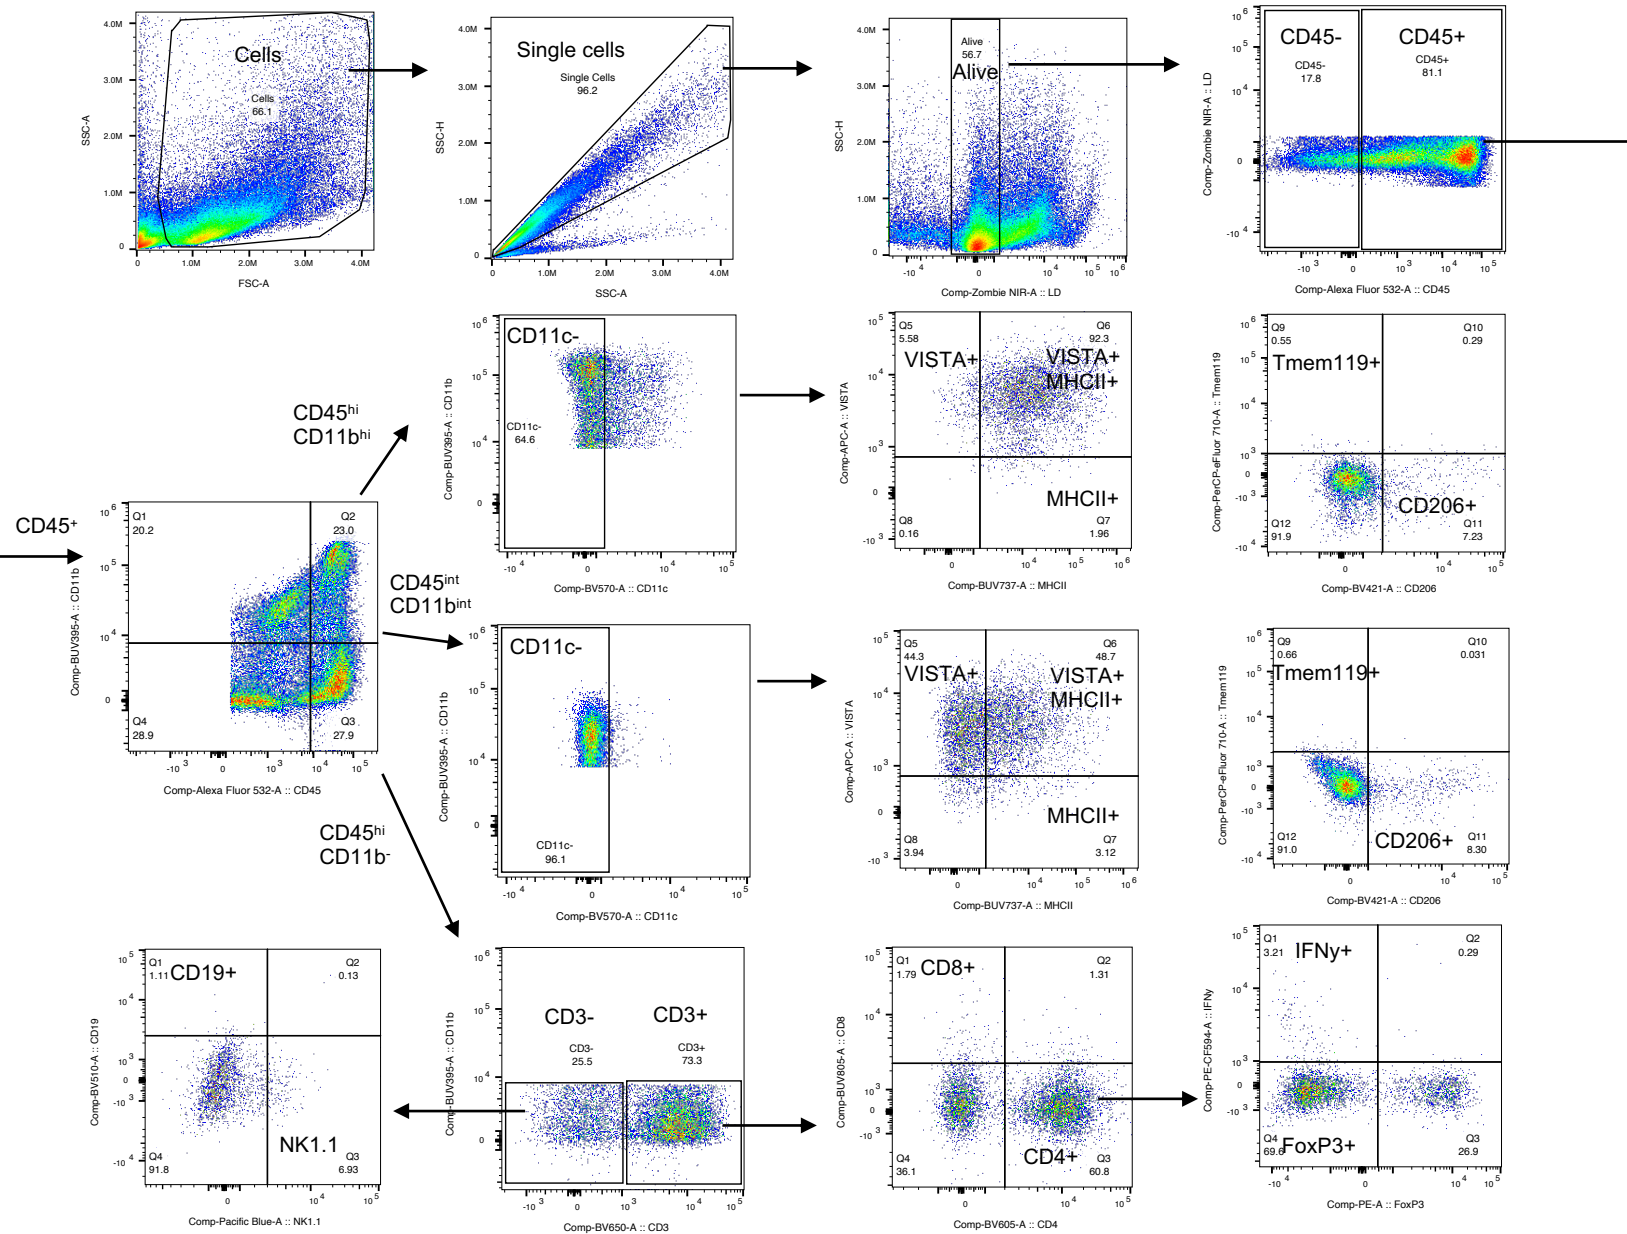

## (b)

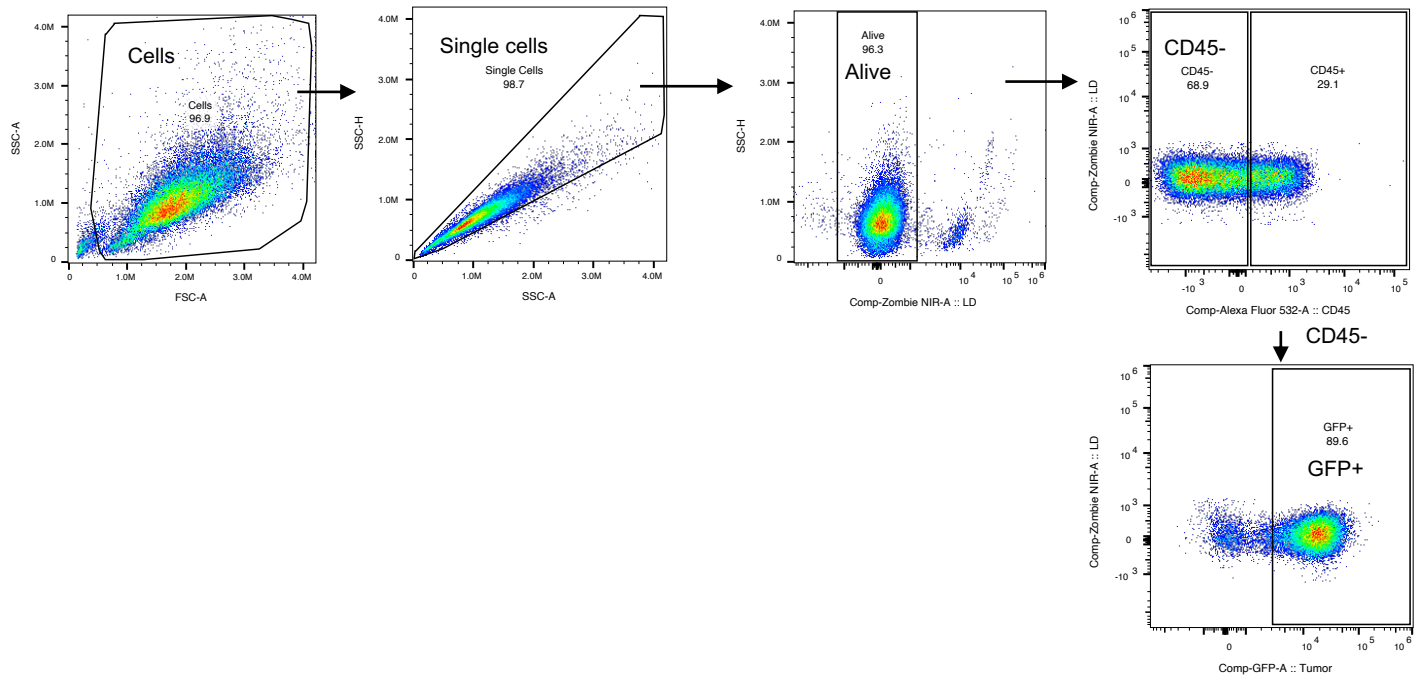

# Figure S2

## (a) Spleen (tumor-bearing mouse)

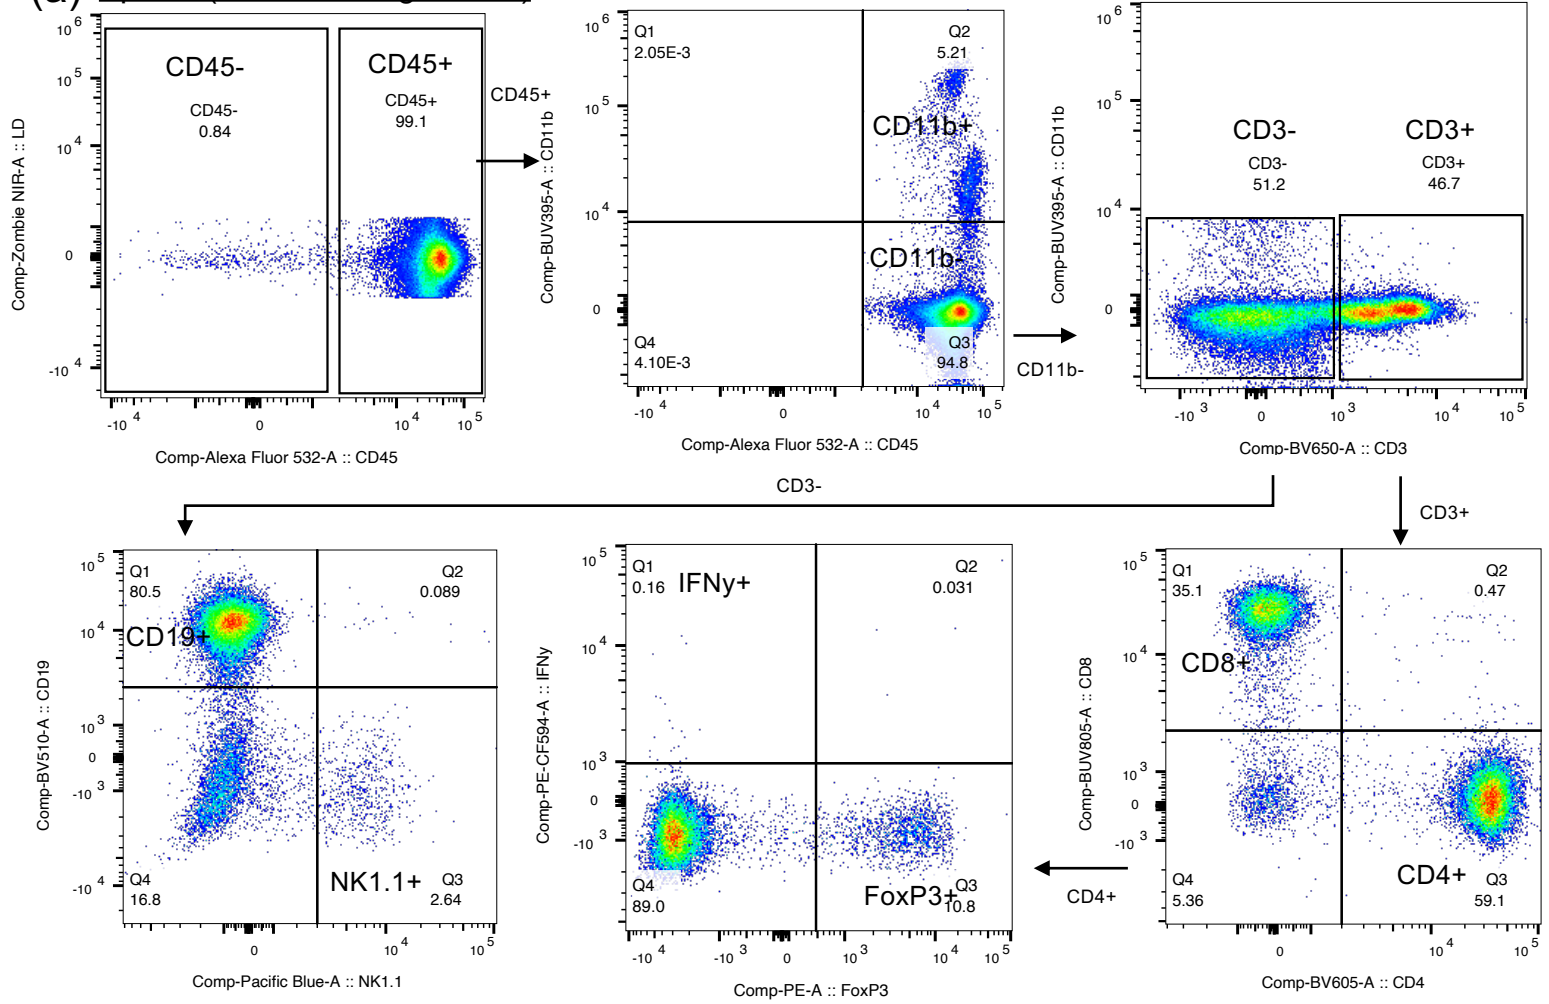

## (b) Bone marrow (tumor-bearing mouse)

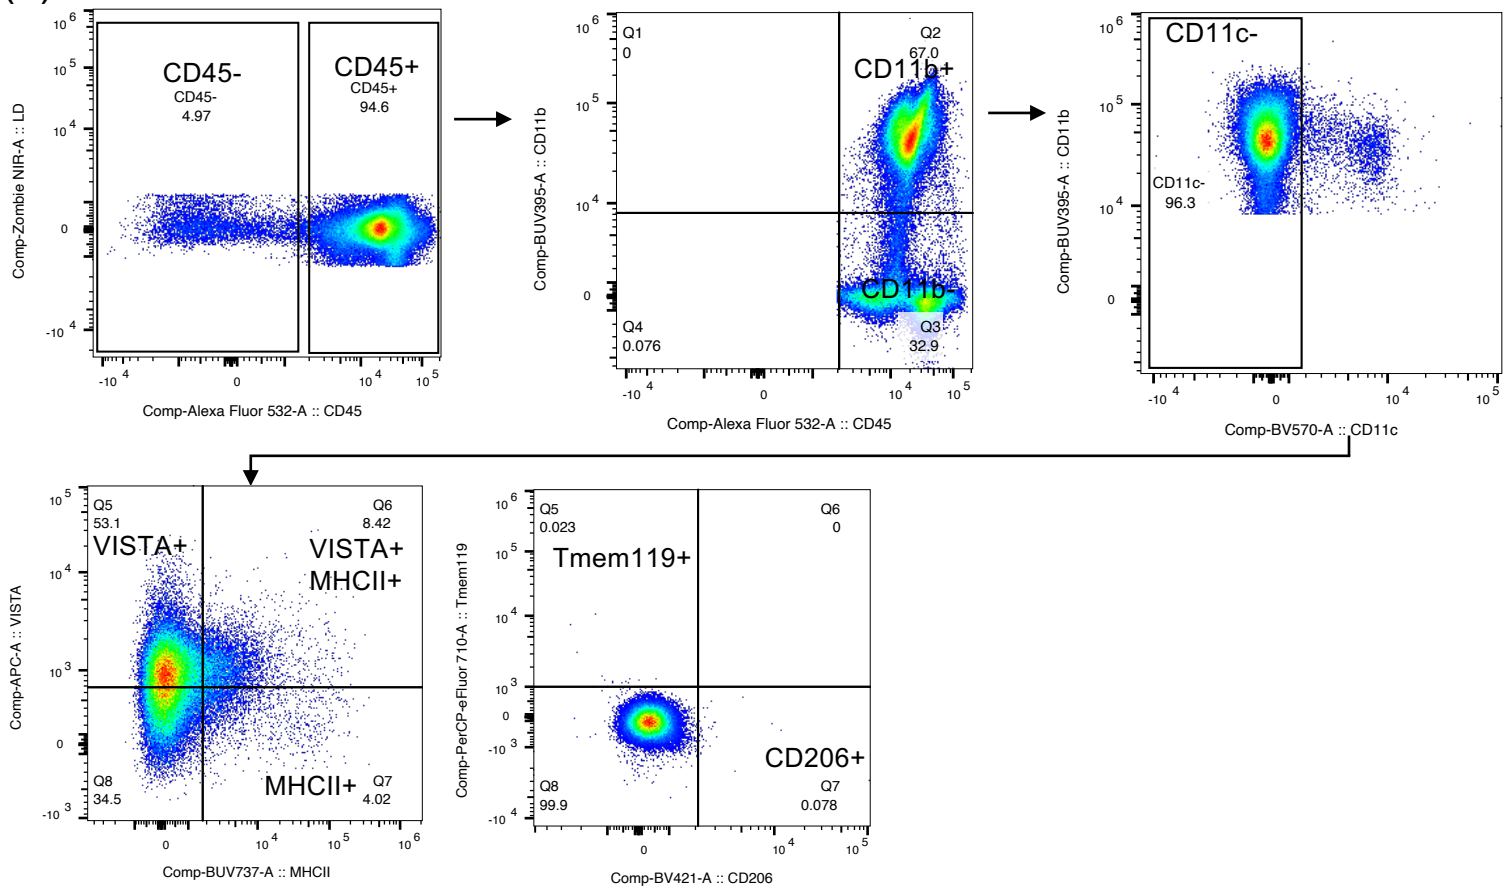



Figure S3

mCB MYC DNp53 (tumor-bearing mice)

Tumor 1

Tumor 2

Tumor 3

Tumor 4

H&E

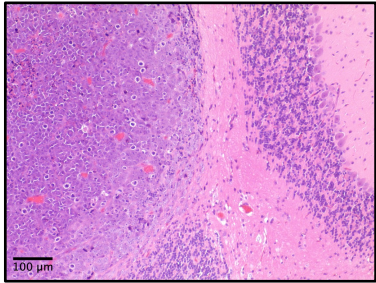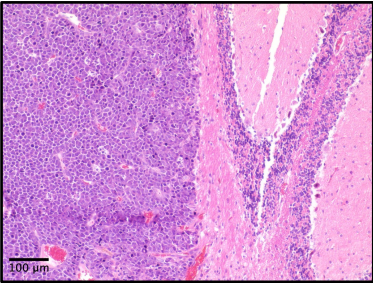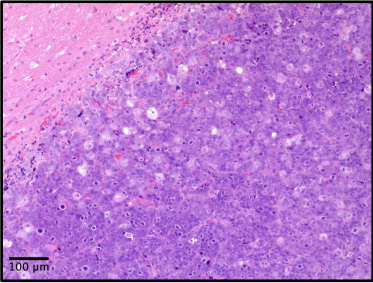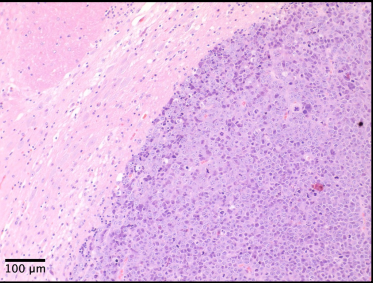

CD11b

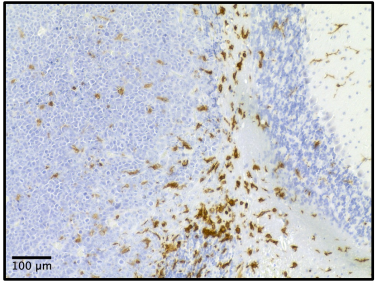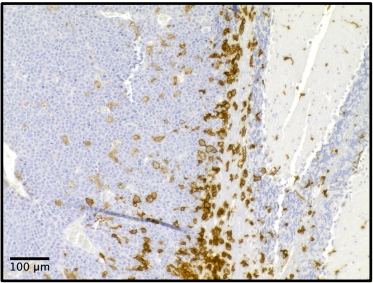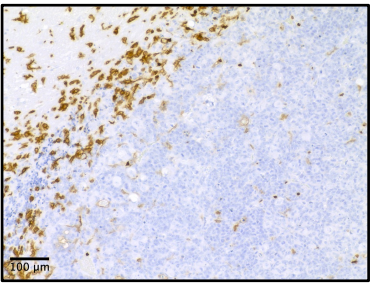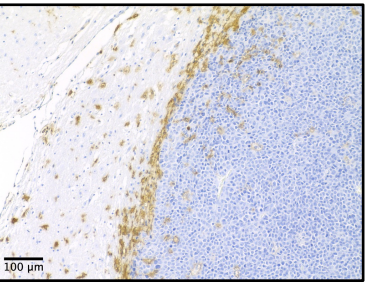

VISTA

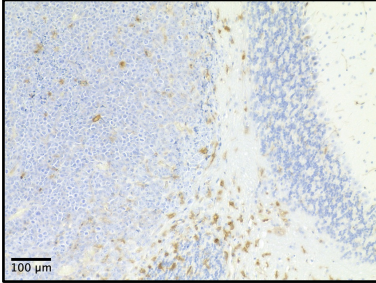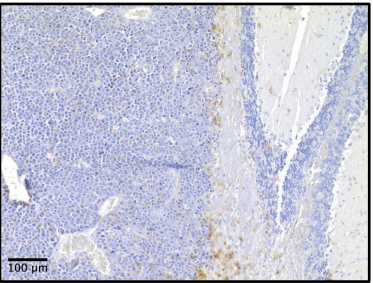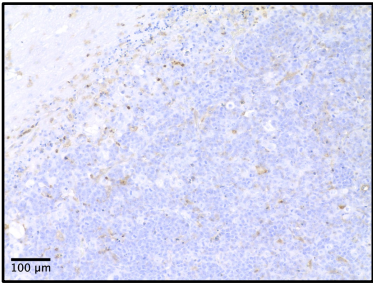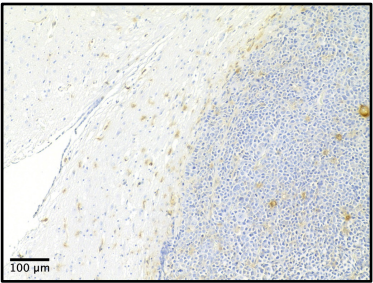

CD3

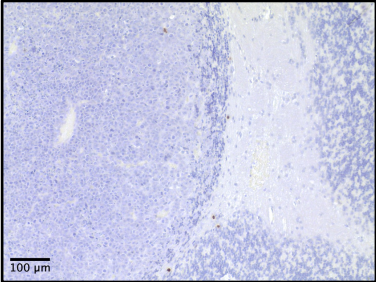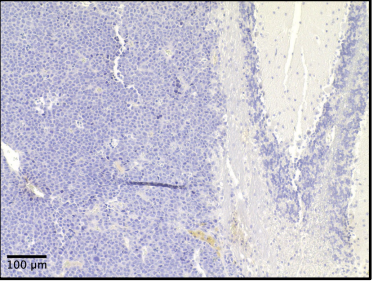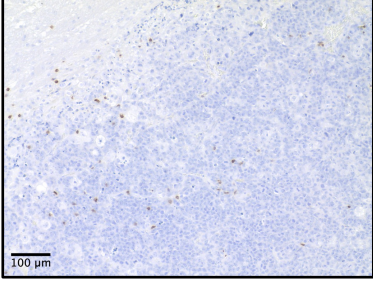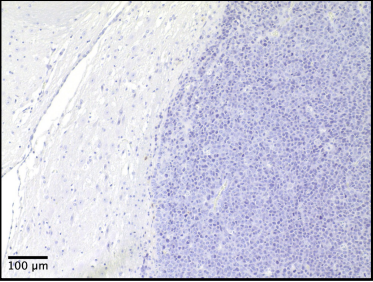

Foxp3

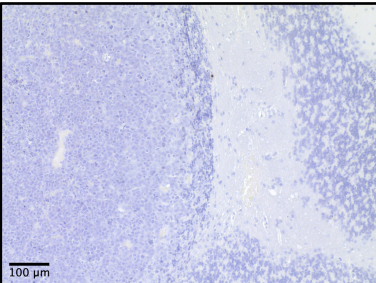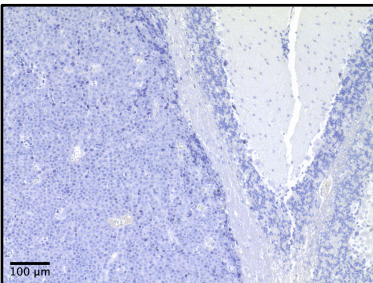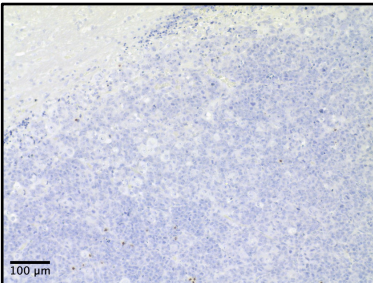

Tissue not available

isotype

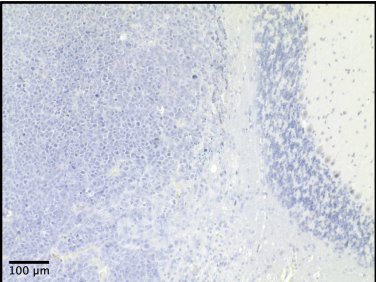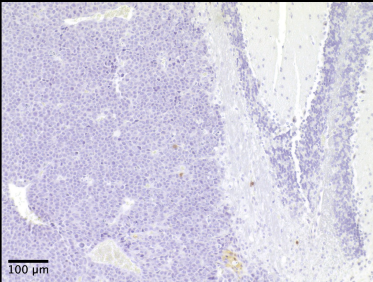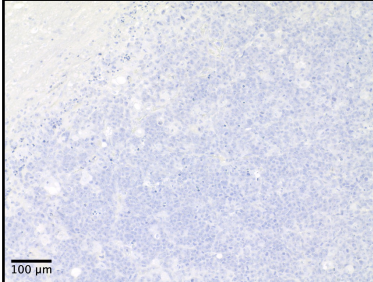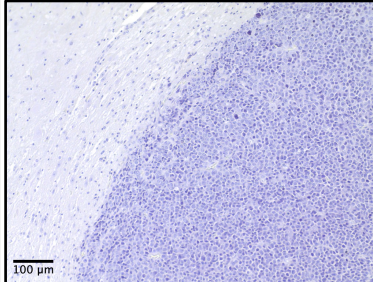



**Figure S4**

(a) mCB MYC DNp53 (tumor-bearing mouse)

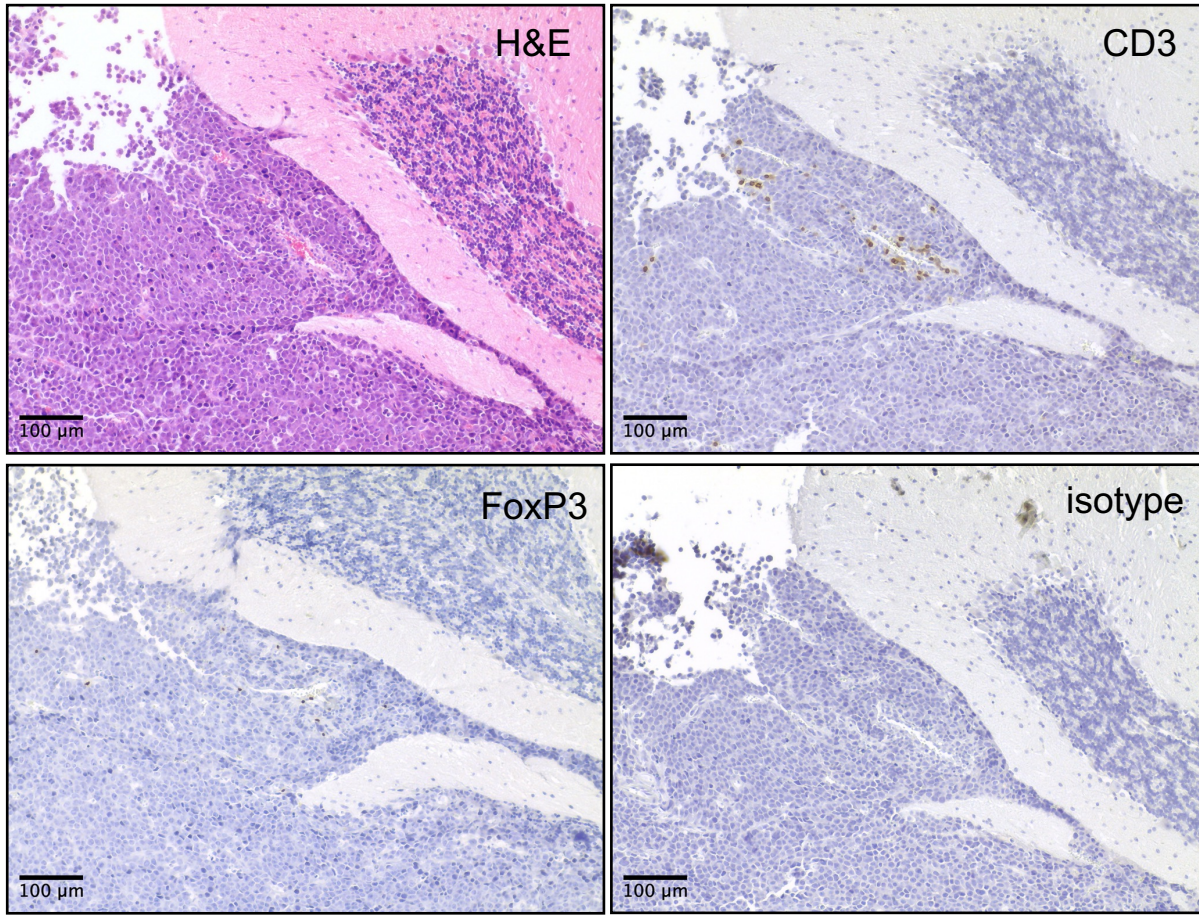

(b) Spleen (tumor-bearing mouse)

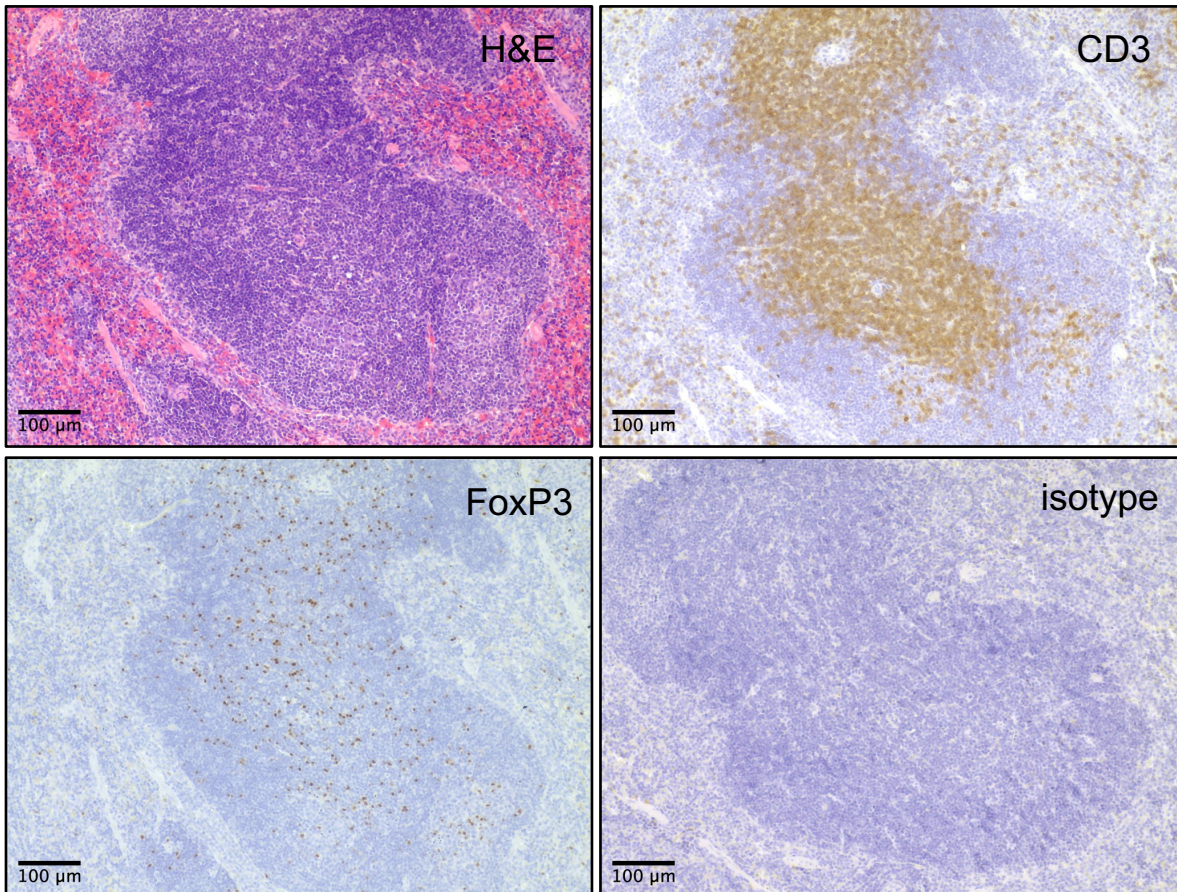



Figure S5

(a)

| VSIG3         |                 |                          |             |
|---------------|-----------------|--------------------------|-------------|
| Cell line     | Sample size (n) | Average (freq of parent) | SD          |
| D283-MED      | 3               | 71.4                     | 34.29562654 |
| D425-MED      | 1               | 27.1                     | n/a         |
| mCB DNp53 MYC | 3               | 86.2                     | 15.17399091 |

  

| VSIG8         |                 |                          |             |
|---------------|-----------------|--------------------------|-------------|
| Cell line     | Sample size (n) | Average (freq of parent) | SD          |
| D283-MED      | 2               | 34.265                   | 43.74869655 |
| D425-MED      | 3               | 37.01                    | 32.42954363 |
| mCB DNp53 MYC | 4               | 46.55                    | 29.56692972 |

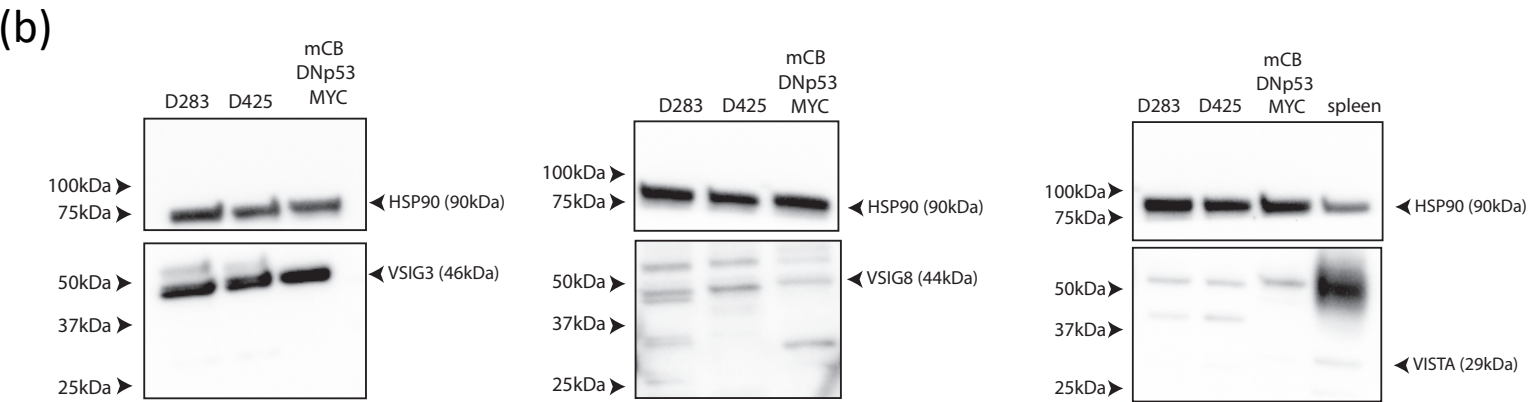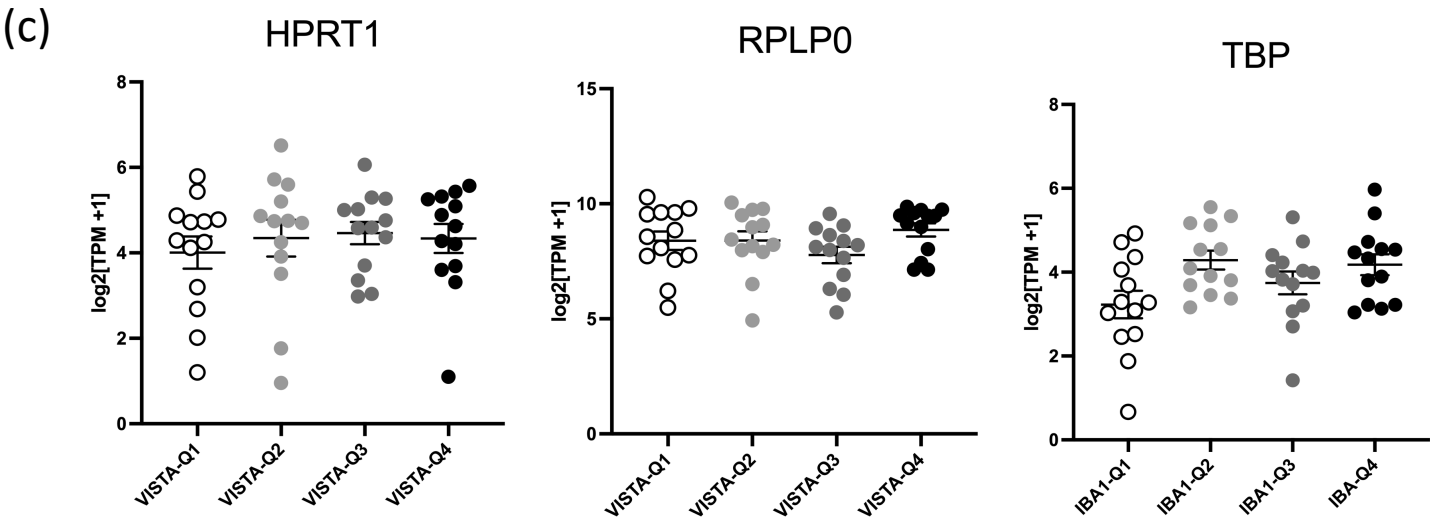

Supplement: s1 [file s1]
